# Supplementary figures and images for: Diffusion-Weighted MR Imaging of the Thymus in Children with Non-Thymic Neoplasms
Source: MDPI journal article supplement (doi:10.3390/diagnostics13243654), 2023-12-13

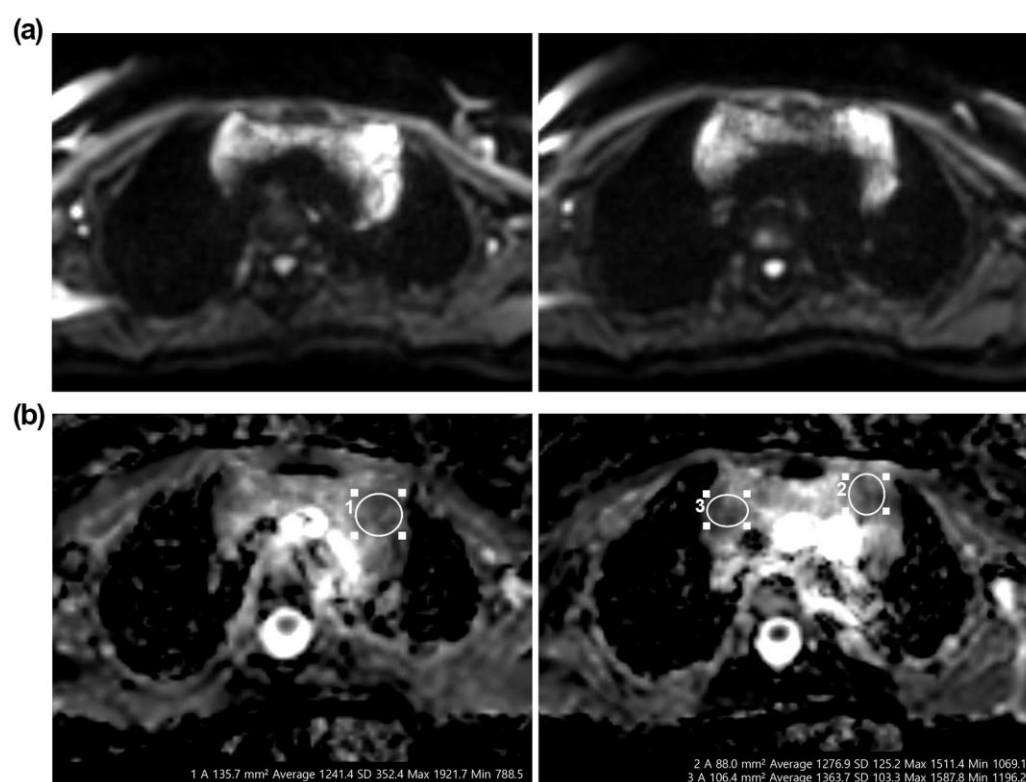

**Figure S1.** Illustration of ROI placement for ADC measurement of the thymus.

Supplement: s1 [file s1]
